# Supplementary material
Source: Copernicus journal article supplement (doi:10.5194/egusphere-2025-5874)
Supplement: Supplementary file [file egusphere-2025-5874-AC1-supplement.pdf]

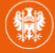

Uniwersytet Wrocławski  
Wydział Nauk o Ziemi  
i Kształtowania Środowiska

Faculty of Earth Sciences and Environmental Management

(Uniwersytet Wrocławski)

Uniwersytet Wrocławski > Faculty of Earth Sciences and Environmental Management >

**!** Info – This draft version needs to be submitted for review. When ready for sharing, please **submit it for review**.

## SWISENS POLENO JUPITER TRAINING DATASETS

Draft Unpublished

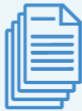

Tomczyk, Szymon; Werner, Małgorzata; Malkiewicz, Małgorzata, 2026, "SWISENS POLENO JUPITER TRAINING DATASETS", <https://doi.org/10.34616/DMTZAB>, Uniwersytet Wrocławski, DRAFT VERSION **!**

Cite Dataset ▾

Learn about [Data Citation Standards](#).

Access Dataset ▾

Submit for Review

Edit Dataset ▾

Link Dataset

Contact Owner

Share

### Description **?**

The data were created during training sessions conducted with the Swisens Poleno Jupiter developed by Swisens AG in Switzerland. The repository contains 11 datasets representing five different tree taxa: five datasets for Alnus, two for Betula, one for Fraxinus, one for Pinus, and two for Quercus. Each dataset includes information for every recorded event, corresponding to individual particles detected during the training process. For each event, the repository provides two holographic images of the particle, three .npy files, and a .json file containing detailed information about the analysed particle.

### Dataset Metrics **?**

0 Downloads **?**

### Keyword **?**

pollen detection, machine learning, holography images, fluorescence spectra, real time detection

### License/Data Use Agreement

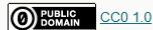

[CC0 1.0](#)

Files

Metadata

Licenses and terms

Versions

Search this dataset...

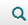

[+ Upload Files](#)
